# Supplementary material for: Lithium Exposure During Pregnancy and the Postpartum Period: A Systematic Review and Meta-Analysis of Safety and Efficacy Outcomes
Source: Atypon-hosted journal article supplement (doi:10.1176/appi.ajp.2019.19030228), 2019-10-18
Supplement: appi.ajp.2019.19030228.ds001.pdf [file appi.ajp.2019.19030228.ds001.pdf]

Data Supplement for Fornaro et al., Lithium Exposure During Pregnancy and the Postpartum Period: A Systematic Review and Meta-Analysis of Safety and Efficacy Outcomes. *Am J Psychiatry* (doi: 10.1176/appi.ajp.2019.19030228)

**TABLE S1.** List of studies excluded after full-text assessment

| <b>Authors, year</b>                                        | <b>Reason for exclusion</b>           |
|-------------------------------------------------------------|---------------------------------------|
| (Poornima Rao, Rajpal, Bali, & Kau, 2018)                   | Case report                           |
| (Zamani, Paezi, & Hassanian-Moghaddam, 2017)                | Case report                           |
| (Heller et al., 2017)                                       | No data on lithium safety or efficacy |
| (Kieviet, de Jong, Scheele, Dolman, & Honig, 2017)          | No data on lithium safety or efficacy |
| (Nishigori et al., 2017)                                    | No data on lithium safety or efficacy |
| (Develin, 2017; Uguz, 2017)                                 | No data on lithium safety or efficacy |
| (Uguz, 2017)                                                | No data on lithium safety or efficacy |
| (Chigome et al., 2017)                                      | No data on lithium safety or efficacy |
| (Boden et al., 2012)                                        | No data on lithium safety or efficacy |
| (Kallen & Reis, 2012)                                       | No data on lithium safety or efficacy |
| (Petersen et al., 2016)                                     | No data on lithium safety or efficacy |
| (Wesseloo et al., 2017)                                     | No data on lithium safety or efficacy |
| (Westin et al., 2017)                                       | No data on lithium safety or efficacy |
| (Broeks, Thisted Horsdal, Glejsted Ingstrup, & Gasse, 2017) | No data on lithium safety or efficacy |
| (Leong et al., 2017)                                        | No data on lithium safety or efficacy |
| (Michielsen, van der Heijden, Janssen, & Kuijpers, 2014)    | No data on lithium safety or efficacy |
| (Sebela, Noskova, Goetz, & Mohr, 2017)                      | Not in English (Czech)                |
| (Kerremans, 2017)                                           | Not in English (Dutch)                |
| (Prieto et al., 2018)                                       | Not in English (Spanish)              |
| (Umylny, German, & Lantiere, 2017)                          | Review                                |
| (Howdeshell & Ornoy, 2017)                                  | Review                                |
| (Sani, Perugi, & Tondo, 2017)                               | Review                                |
| (Ornoy, Weinstein-Fudim, & Ergaz, 2017)                     | Review                                |
| (Thomson & Sharma, 2018)                                    | Review                                |
| (Parker, Graham, & Tavella, 2017)                           | Review                                |
| (Thomson & Sharma, 2017)                                    | Review                                |
| (Graham, Tavella, & Parker, 2018)                           | Review                                |
| (Scrandis, 2017)                                            | Review                                |
| (Haskey & Galbally, 2017)                                   | Review                                |
| (Aftab & Shah, 2017)                                        | Review                                |
| (Sharma, Doobay, & Baczynski, 2017)                         | Review                                |
| (Smith & Dubovsky, 2017)                                    | Review                                |
| (Jones & Jones, 2017)                                       | Review                                |

## References (excluded articles)

- Aftab, A., & Shah, A. A. (2017). Behavioral Emergencies: Special Considerations in the Pregnant Patient. *Psychiatr Clin North Am*, 40(3), 435-448. doi:10.1016/j.psc.2017.05.017
- Boden, R., Lundgren, M., Brandt, L., Reutfors, J., Andersen, M., & Kieler, H. (2012). Risks of adverse pregnancy and birth outcomes in women treated or not treated with mood stabilisers for bipolar disorder: population based cohort study. *BMJ*, 345, e7085. doi:10.1136/bmj.e7085
- Broeks, S. C., Thisted Horsdal, H., Glejsted Ingstrup, K., & Gasse, C. (2017). Psychopharmacological drug utilization patterns in pregnant women with bipolar disorder - A nationwide register-based study. *J Affect Disord*, 210, 158-165. doi:10.1016/j.jad.2016.12.001
- Chigome, A., Matsangaise, M., Chukwu, B., Matlala, M., Sibanda, M., & Meyer, J. (2017). Review of selective serotonin reuptake inhibitors. *SA Pharmaceutical Journal*.(84 (6) ), 52-59.
- Develin, A. (2017). Medicines toxicity and the core skills of a pharmacist. *Australian Journal of Pharmacy*.(98 (1168)), 70-77.
- Graham, R. K., Tavella, G., & Parker, G. B. (2018). Is there consensus across international evidence-based guidelines for the psychotropic drug management of bipolar disorder during the perinatal period? *J Affect Disord*, 228, 216-221. doi:10.1016/j.jad.2017.12.022
- Haskey, C., & Galbally, M. (2017). Mood stabilizers in pregnancy and child developmental outcomes: A systematic review. *Aust N Z J Psychiatry*, 51(11), 1087-1097. doi:10.1177/0004867417726175
- Heller, H., Ravelli, A., Bruning, A., de Groot, C., Scheele, F., van Pampus, M., & Honig, A. (2017). Increased postpartum haemorrhage, the possible relation with serotonergic and other psychopharmacological drugs: A matched cohort study. *BMC Pregnancy and Childbirth*. 17 (1).
- Howdeshell, K. L., & Ornoy, A. (2017). Depression and Its Treatment During Pregnancy: Overview and Highlights. *Birth Defects Res*, 109(12), 877-878. doi:10.1002/bdr2.1080
- Jones, S. C., & Jones, I. (2017). Pharmacological Management of Bipolar Disorder in Pregnancy. *CNS Drugs*, 31(9), 737-745. doi:10.1007/s40263-017-0452-x
- Kallen, B., & Reis, M. (2012). Neonatal complications after maternal concomitant use of SSRI and other central nervous system active drugs during the second or third trimester of pregnancy. *J Clin Psychopharmacol*, 32(5), 608-614. doi:10.1097/JCP.0b013e3182668568
- Kerremans, A. (2017). Lithium and pregnancy. *Geneesmiddelenbulletin*(51 (11) ), 91-92.
- Kieviet, N., de Jong, F., Scheele, F., Dolman, K. M., & Honig, A. (2017). Use of antidepressants during pregnancy in the Netherlands: observational study into postpartum interventions. *BMC Pregnancy Childbirth*, 17(1), 23. doi:10.1186/s12884-016-1184-5
- Leong, C., Raymond, C., Chateau, D., Dahl, M., Alessi-Severini, S., Falk, J., . . . Katz, A. (2017). Psychotropic Drug Use before, during, and after Pregnancy: A Population-Based Study in a Canadian Cohort (2001-2013). *Can J Psychiatry*, 62(8), 543-550. doi:10.1177/0706743717711168
- Michielsen, L. A., van der Heijden, F. M., Janssen, P. K., & Kuijpers, H. J. (2014). Effects of maternal psychotropic drug dosage on birth outcomes. *Neuropsychiatr Dis Treat*, 10, 13-18. doi:10.2147/NDT.S53430
- Nishigori, H., Obara, T., Nishigori, T., Mizuno, S., Metoki, H., Hoshiai, T., . . . Children's Study, G. (2017). Selective serotonin reuptake inhibitors and risk of major congenital anomalies for pregnancies in Japan: A nationwide birth cohort study of the Japan Environment and Children's Study. *Congenit Anom (Kyoto)*, 57(3), 72-78. doi:10.1111/cga.12202
- Ornoy, A., Weinstein-Fudim, L., & Ergaz, Z. (2017). Antidepressants, Antipsychotics, and Mood Stabilizers in Pregnancy: What Do We Know and How Should We Treat Pregnant Women with Depression. *Birth Defects Res*, 109(12), 933-956. doi:10.1002/bdr2.1079

- Parker, G. B., Graham, R. K., & Tavella, G. (2017). Is there consensus across international evidence-based guidelines for the management of bipolar disorder? *Acta Psychiatr Scand*, *135*(6), 515-526. doi:10.1111/acps.12717
- Petersen, I., McCrear, R. L., Sammon, C. J., Osborn, D. P., Evans, S. J., Cowen, P. J., . . . Nazareth, I. (2016). Risks and benefits of psychotropic medication in pregnancy: cohort studies based on UK electronic primary care health records. *Health Technol Assess*, *20*(23), 1-176. doi:10.3310/hta20230
- Poornima Rao, S., Rajpal, N., Bali, S., & Kau, N. (2018). Bipolar affective disorder and wilson's disease: Case report and review of literature. *Indian Journal of Psychiatry. Conference: 70th Annual National Conference of Indian Psychiatric Society, ANCIPS 2018. India., 60* (5 Supplement 1) S151.
- Prieto, M., Oraa, R., Zardoya, M., Uriarte, J., Malo, P., Medrano, J., & Pacheco, L. (2018). The use of mood regulators in pregnancy and breastfeeding. *Psiquiatria Biologica*.
- Sani, G., Perugi, G., & Tondo, L. (2017). Treatment of Bipolar Disorder in a Lifetime Perspective: Is Lithium Still the Best Choice? *Clin Drug Investig*, *37*(8), 713-727. doi:10.1007/s40261-017-0531-2
- Scrandis, D. A. (2017). Bipolar Disorder in Pregnancy: A Review of Pregnancy Outcomes. *J Midwifery Womens Health*, *62*(6), 673-683. doi:10.1111/jmwh.12645
- Sebela, A., Noskova, E., Goetz, M., & Mohr, P. (2017). Psychotropic drugs in pregnancy - do they reduce or increase the risks for the fetus? Part two: Mood stabilizers, anxiolytics. *Pediatric pro Praxi*.(18 (6)), 352-355.
- Sharma, V., Doobay, M., & Baczynski, C. (2017). Bipolar postpartum depression: An update and recommendations. *J Affect Disord*, *219*, 105-111. doi:10.1016/j.jad.2017.05.014
- Smith, B., & Dubovsky, S. L. (2017). Pharmacotherapy of mood disorders and psychosis in pre- and post-natal women. *Expert Opin Pharmacother*, *18*(16), 1703-1719. doi:10.1080/14656566.2017.1391789
- Thomson, M., & Sharma, V. (2017). Between a rock-a-bye and a hard place: mood disorders during the peripartum period. *CNS Spectr*, *22*(S1), 49-64. doi:10.1017/S1092852917000852
- Thomson, M., & Sharma, V. (2018). Weighing the Risks: the Management of Bipolar Disorder During Pregnancy. *Curr Psychiatry Rep*, *20*(3), 20. doi:10.1007/s11920-018-0882-2
- Uguz, F. (2017). Prophylactic use of olanzapine and quetiapine from pregnancy to the postpartum period in women with bipolar disorder: a case series. *J Matern Fetal Neonatal Med*, *30*(21), 2569-2571. doi:10.1080/14767058.2016.1256991
- Umylny, P., German, M., & Lantiere, A. (2017). Treating postpartum mood and anxiety disorders in primary care pediatrics. *Curr Probl Pediatr Adolesc Health Care*, *47*(10), 254-266. doi:10.1016/j.cppeds.2017.08.003
- Wesseloo, R., Wierdsma, A. I., van Kamp, I. L., Munk-Olsen, T., Hoogendijk, W. J. G., Kushner, S. A., & Bergink, V. (2017). Lithium dosing strategies during pregnancy and the postpartum period. *Br J Psychiatry*, *211*(1), 31-36. doi:10.1192/bjp.bp.116.192799
- Westin, A. A., Brekke, M., Molden, E., Skogvoll, E., Aadal, M., & Spigset, O. (2017). Changes in drug disposition of lithium during pregnancy: a retrospective observational study of patient data from two routine therapeutic drug monitoring services in Norway. *BMJ Open*, *7*(3), e015738. doi:10.1136/bmjopen-2016-015738
- Zamani, N., Paezi, M., & Hassanian-Moghaddam, H. (2017). Lithium Toxicity in a Pregnant Woman. *Basic Clin Pharmacol Toxicol*, *120*(5), 509-511. doi:10.1111/bcpt.12747

**TABLE S2.** Quality assessment of the included studies

|                             |             | NEWCASTLE-OTTAWA SCALE CASE-CONTROL STUDIES ( <a href="http://www.ohri.ca/programs/clinical_epidemiology/oxford.asp">http://www.ohri.ca/programs/clinical_epidemiology/oxford.asp</a> ) |                                                             |                                            |                                                                                                     |                                            |                                           |                                      |                                              |                       |  |
|-----------------------------|-------------|-----------------------------------------------------------------------------------------------------------------------------------------------------------------------------------------|-------------------------------------------------------------|--------------------------------------------|-----------------------------------------------------------------------------------------------------|--------------------------------------------|-------------------------------------------|--------------------------------------|----------------------------------------------|-----------------------|--|
| <i>Author</i>               | <i>Year</i> | <i>Selection—Case definition</i>                                                                                                                                                        | <i>Selection—Representativeness of the cases</i>            | <i>Selection—Selection of controls</i>     | <i>Selection—Definition of controls</i>                                                             | <i>Comparability of cases and controls</i> | <i>Exposure—Ascertainment of exposure</i> | <i>Exposure—Nonresponse rate</i>     |                                              | <i>Quality rating</i> |  |
| Edmonds                     | 1990        | *                                                                                                                                                                                       | *                                                           | *                                          | *                                                                                                   | *                                          | *                                         | *                                    |                                              | Good                  |  |
| Zalztein                    | 1990        | *                                                                                                                                                                                       | *                                                           | *                                          | *                                                                                                   | *                                          | -                                         | -                                    |                                              | Good                  |  |
| Czeizel                     | 1990        | *                                                                                                                                                                                       | *                                                           | *                                          | *                                                                                                   | **                                         | *                                         | *                                    |                                              | Good                  |  |
| Lisi                        | 2010        | *                                                                                                                                                                                       | *                                                           | *                                          | *                                                                                                   | **                                         | *                                         | *                                    |                                              | Good                  |  |
| Boyle                       | 2016        | *                                                                                                                                                                                       | *                                                           | *                                          | *                                                                                                   | **                                         | *                                         | *                                    |                                              | Good                  |  |
|                             |             | NEWCASTLE-OTTAWA SCALE COHORT STUDIES ( <a href="http://www.ohri.ca/programs/clinical_epidemiology/oxford.asp">http://www.ohri.ca/programs/clinical_epidemiology/oxford.asp</a> )       |                                                             |                                            |                                                                                                     |                                            |                                           |                                      |                                              |                       |  |
| <i>Author</i>               | <i>Year</i> | <i>Selection—Representativeness of exposed cohort</i>                                                                                                                                   | <i>Selection—Representativeness of the unexposed cohort</i> | <i>Selection—Ascertainment of exposure</i> | <i>Selection—Demonstration, outcome of the study, was not present at the beginning of the study</i> | <i>Comparability of cohorts</i>            | <i>Outcome—Assessment of outcome</i>      | <i>Outcome—Follow-up long enough</i> | <i>Outcome—Adequacy of follow-up cohorts</i> | <i>Quality rating</i> |  |
| <b>Prospective cohort</b>   |             |                                                                                                                                                                                         |                                                             |                                            |                                                                                                     |                                            |                                           |                                      |                                              |                       |  |
| Schou                       | 1976        | *                                                                                                                                                                                       | -                                                           | -                                          | -                                                                                                   | -                                          | -                                         | *                                    | *                                            | Poor                  |  |
| Jacobson                    | 1992        | *                                                                                                                                                                                       | *                                                           | *                                          | *                                                                                                   | *                                          | *                                         | *                                    | *                                            | Good                  |  |
| Diav-citrin                 | 2014        | *                                                                                                                                                                                       | *                                                           | *                                          | *                                                                                                   | *                                          | *                                         | *                                    | *                                            | Good                  |  |
| Newport                     | 2005        | -                                                                                                                                                                                       | -                                                           | *                                          | *                                                                                                   | *                                          | *                                         | *                                    | *                                            | Poor                  |  |
| <b>Retrospective cohort</b> |             |                                                                                                                                                                                         |                                                             |                                            |                                                                                                     |                                            |                                           |                                      |                                              |                       |  |
| Schou                       | 1973        | -                                                                                                                                                                                       | -                                                           | *                                          | *                                                                                                   | *                                          | *                                         | *                                    | *                                            | Poor                  |  |
| Weinstein                   | 1975        | *                                                                                                                                                                                       | -                                                           | -                                          | *                                                                                                   | -                                          | *                                         | *                                    | *                                            | Poor                  |  |
| Weinstein                   | 1976        | *                                                                                                                                                                                       | -                                                           | -                                          | *                                                                                                   | -                                          | *                                         | *                                    | *                                            | Poor                  |  |
| Kallen                      | 1983        | *                                                                                                                                                                                       | *                                                           | *                                          | *                                                                                                   | *                                          | *                                         | *                                    | *                                            | Good                  |  |
| Troyer                      | 1993        | *                                                                                                                                                                                       | *                                                           | *                                          | *                                                                                                   | *                                          | *                                         | *                                    | *                                            | Good                  |  |
|                             |             | <i>Selection—Representativeness of exposed cohort</i>                                                                                                                                   | <i>Selection—Representativeness of the unexposed cohort</i> | <i>Selection—Ascertainment of exposure</i> | <i>Selection—Demonstration, outcome of the study was not present at the beginning of the study</i>  | <i>Comparability of cohorts</i>            | <i>Outcome—Assessment of outcome</i>      | <i>Outcome—Follow-up long enough</i> | <i>Outcome—Adequacy of follow-up cohorts</i> | <i>Quality rating</i> |  |
| Kallen                      | 2012        | *                                                                                                                                                                                       | *                                                           | *                                          | *                                                                                                   | *                                          | *                                         | *                                    | *                                            | Good                  |  |
| Van der Lugt                | 2012        | -                                                                                                                                                                                       | -                                                           | *                                          | *                                                                                                   | -                                          | *                                         | *                                    | *                                            | Poor                  |  |

(Continued)

Table S2 Continued

|                                                                                                                                                                                                                                                                                                                                                                                                   |             |                                   |                               |                                 |                                              |                                                   |                                |                            |                   |                |
|---------------------------------------------------------------------------------------------------------------------------------------------------------------------------------------------------------------------------------------------------------------------------------------------------------------------------------------------------------------------------------------------------|-------------|-----------------------------------|-------------------------------|---------------------------------|----------------------------------------------|---------------------------------------------------|--------------------------------|----------------------------|-------------------|----------------|
| Wesseloo R.                                                                                                                                                                                                                                                                                                                                                                                       | 2017        | *                                 | *                             | *                               | *                                            | *                                                 | *                              | *                          | *                 | Good           |
| Forsberg L                                                                                                                                                                                                                                                                                                                                                                                        | 2017        | *                                 | *                             | *                               | *                                            | *                                                 | *                              | *                          | *                 | Good           |
| Patomo E.                                                                                                                                                                                                                                                                                                                                                                                         | 2017        | *                                 | *                             | *                               | *                                            | *                                                 | *                              | *                          | *                 | Good           |
| Frayne J.                                                                                                                                                                                                                                                                                                                                                                                         | 2017        | *                                 | *                             | *                               | *                                            | **                                                | *                              | *                          | *                 | Good           |
| Munk-Olsen T. (six international studies)                                                                                                                                                                                                                                                                                                                                                         | 2018        | *                                 | *                             | *                               | *                                            | **                                                | *                              | *                          | *                 | Good           |
| <b>COCHRANE RISK OF BIAS TOOL FOR RANDOMIZED CONTROLLED TRIALS</b>                                                                                                                                                                                                                                                                                                                                |             |                                   |                               |                                 |                                              |                                                   |                                |                            |                   |                |
| <a href="http://methods.cochrane.org/bias/sites/methods.cochrane.org.bias/files/public/uploads/6.%20Assessing%20risk%20of%20bias%20in%20included%20studies%20v1.0%20Standard%20author%20slides.pdf">http://methods.cochrane.org/bias/sites/methods.cochrane.org.bias/files/public/uploads/6.%20Assessing%20risk%20of%20bias%20in%20included%20studies%20v1.0%20Standard%20author%20slides.pdf</a> |             |                                   |                               |                                 |                                              |                                                   |                                |                            |                   |                |
| <b>Author</b>                                                                                                                                                                                                                                                                                                                                                                                     | <b>Year</b> | <b>Random sequence generation</b> | <b>Allocation concealment</b> | <b>Blinding of participants</b> | <b>Blinding of evaluator (self-reported)</b> | <b>Blinding of evaluator (objective measures)</b> | <b>Incomplete outcome data</b> | <b>Selective reporting</b> | <b>Other bias</b> | <b>Overall</b> |
| Austin                                                                                                                                                                                                                                                                                                                                                                                            | 1992        | Unclear                           | High risk                     | High risk                       | High risk                                    | High risk                                         | Low risk                       | Low risk                   | -                 | High           |
| Bergink                                                                                                                                                                                                                                                                                                                                                                                           | 2012        | Unclear                           | Unclear                       | Unclear                         | Unclear                                      | Unclear                                           | Low risk                       | Low risk                   | -                 | Unclear        |
| Rosso                                                                                                                                                                                                                                                                                                                                                                                             | 2016        | High                              | High                          | High                            | Unclear                                      | Unclear                                           | Low risk                       | Low risk                   | Selection bias    | High           |
